# Supplementary material for: Going from green to red electroluminescence through ancillary ligand substitution in ruthenium(ii) tetrazole benzoic acid emitters
Source: Royal Society of Chemistry journal article supplement (doi:10.1039/c3tc31350f), 2013-01-01
Supplement: c3tc31350f.pdf [file c3tc31350f.pdf]

## Supplementary information

### Going from green to red color electroluminescence through ancillary ligand substitution in ruthenium(II) tetrazole benzoic acid emitters

Hashem Shahroosvand<sup>a\*</sup>, Leyla najafi <sup>a</sup>, Ahmad Sousaraei <sup>a</sup>, Ezeddin Mohajerani<sup>b</sup>, Mohammad Janghouri <sup>b</sup>

<sup>a</sup>Chemistry Department, University of Zanjan, Zanjan, Iran.

<sup>b</sup>Laser and Plasma Research Institute, Shahid Beheshti University, Tehran, Iran.

**S1:**

The wavelength of electroluminescence (EL) and photoluminescence (PL) emissions of reported ruthenium complexes.

| Complex/reactant                | $\lambda_{em}$<br>(nm) | $\lambda_{EL}$<br>(nm) | ref   |
|---------------------------------|------------------------|------------------------|-------|
| $Ru(bpy)_3^{2+}$                | 608                    | 608                    | 1,2,3 |
| $Ru(bpy)_3^{2+}/C_2O_4^{2-}$    | 610                    | 610                    | 4     |
| $Ru(bpy)_3^{2+}/C_2O_4^{2-}$    |                        | 591                    | 5     |
| $Ru(bpy)_3^{2+}/S_2O_8^{2-}$    | 625                    | 625                    | 4,6   |
| $Ru(bpy)_3^{2+}/TPrA$           | 610                    | 610                    | 7     |
| $Ru(dmbp)_3^{2+}/C_2O_4^{2-}$   |                        | 594                    | 5     |
| $Ru(phen)_3^{2+}$               | 590                    | 590                    | 8     |
| $Ru(phen)_3^{2+}/C_2O_4^{2-}$   |                        | 585                    | 5     |
| $Ru(dmphen)_3^{2+}/C_2O_4^{2-}$ |                        | 591                    | 5     |
| $Ru(terpy)_3^{2+}$              |                        | 660                    | 8     |
| $Ru(bpz)_3^{2+}$                | 585                    | 585                    | 9,10  |
| $Ru(bpz)_3^{2+}/S_2O_8^{2-}$    | 585                    | 590                    | 11    |
| $Ru(dp-bpy)_3^{2+}$             | 635                    | 635                    | 12    |

|                                                                              |     |     |    |
|------------------------------------------------------------------------------|-----|-----|----|
| $\text{Ru}(\text{dp-phen})_3^{2+}$                                           | 615 | 615 | 12 |
| $(\text{bpy})_2\text{Ru}(\text{bphb})^{2+}$                                  | 624 | 624 | 13 |
| $(\text{bpy})_2\text{Ru}(\text{bphb})^{2+} / \text{TPrA}$                    | 624 | 624 | 13 |
| $(\text{bpy})_2\text{Ru}(\text{bphb})^{2+} / \text{S}_2 \text{O}_8^{2-}$     | 624 | 624 | 13 |
| $[(\text{bpy})_2\text{Ru}]_2(\text{bphb})^{4+}$                              | 624 | 624 | 13 |
| $[(\text{bpy})_2\text{Ru}]_2(\text{bphb})^{4+} / \text{TPrA}$                | 624 | 624 | 13 |
| $[(\text{bpy})_2\text{Ru}]_2(\text{bphb})^{4+} / \text{S}_2 \text{O}_8^{2-}$ | 624 | 624 | 13 |
| $(\text{bpy})_2\text{Ru}(\text{AZA-bpy})^{2+} / \text{TPrA}$                 | 603 | 603 | 14 |
| $(\text{bpy})_2\text{Ru}(\text{AZA-bpy})^{2+} / \text{TPrA}$                 | 613 | 613 | 14 |
| $(\text{bpy})_2\text{Ru}(\text{CE-bpy})^{2+} / \text{TPrA}$                  |     | 650 | 15 |
| $(\text{bpy})_2\text{Ru}(\text{CE-bpy})^{2+} / \text{TPrA}$                  |     | 655 | 15 |
| $\text{Ru}(\text{v-bpy})_3^{2+}$                                             | 630 | 650 | 16 |
| $(\text{bpy})_2\text{Ru}(\text{DC-bpy})^{2+}$                                | 629 | 629 | 17 |
| $(\text{bpy})_2\text{Ru}(\text{DM-bpy})^{2+}$                                | 605 | 605 | 17 |
| $(\text{bpy})_2\text{Ru}(\text{dpen-bpy})^{2+} / \text{PF}_6^-$              | 612 | 612 | 18 |

|                                                        |      |      |    |
|--------------------------------------------------------|------|------|----|
| $\text{Ru(m-bpy)}_3^{2+} / \text{PF}_6^-$              | 609  | 612  | 18 |
| $\text{Ru(dtb-bpy)}_3^{2+} / \text{PF}_6^-$            | 610  | 611  | 18 |
| $(\text{bpy})_2\text{Ru(DIM)}^{2+}$                    | 600  | 600  | 19 |
| $(\text{bpy})_2\text{Ru(PBIm-H)}^{2+} / \text{PF}_6^-$ |      | 680  | 20 |
| $[\text{Ru(tpy)(tpy-COOEt)}] / \text{PF}_6^-$          | 706  | 706  | 21 |
| $\text{Ru(DM-bpy)}_3^{2+}$                             | 604  | 615  | 22 |
| $(\text{bpy})_2\text{Ru(dbeb)}^{2+} / \text{PF}_6^-$   | 642  | 640  | 23 |
| $(\text{bpy})_2\text{Ru(pbq)}^{2+}$                    | 900  | 900  | 24 |
| $(\text{PBIm-H})_2\text{Ru(pbq)}^{2+}$                 | 945  | 945  | 24 |
| $(\text{PBIm-H})_2\text{Ru(acac)}^{2+}$                | 850  | 880  | 24 |
| $[\text{Ru(PBIM-H)}_2]_2(\text{pbq})^{+2}$             | 1040 | 1040 | 24 |
| $\text{Ru(tpy)(trz)}^{2+} / \text{PF}_6^-$             | 723  | 717  | 25 |
| $\text{Ru(tpy-COOEt)(trz)}^{2+} / \text{PF}_6^-$       | 717  | 725  | 25 |
| $(\text{bpy})_2\text{Ru(Mt-bpy)}^{2+} / \text{PF}_6^-$ | 625  | 557  | 26 |

|                                                                                               |     |     |    |
|-----------------------------------------------------------------------------------------------|-----|-----|----|
| RuTRu                                                                                         | 625 | 598 | 26 |
| (bpy) <sub>2</sub> Ru(aa-bpy) <sup>2+</sup> /PF <sub>6</sub> <sup>-</sup>                     | 649 | 699 | 27 |
| Ru <sub>2</sub> (bpy) <sub>4</sub> (im-phen) / ClO <sub>4</sub> <sup>-</sup>                  | 638 | 655 | 28 |
| (bpy) <sub>2</sub> Ru(Eh-bpy) <sup>2+</sup> /PF <sub>6</sub> <sup>-</sup>                     | 427 | 600 | 29 |
| (bpy) <sub>2</sub> Ru(Hmh-bpy) <sup>2+</sup> /PF <sub>6</sub> <sup>-</sup>                    | 427 | 600 | 29 |
| (H <sub>2</sub> MPy <sub>3</sub> ,4DMPP)Ru(bpy) <sub>2</sub> Cl /PF <sub>6</sub> <sup>-</sup> | 655 | 656 | 30 |
| Ru <sub>2</sub> (bpy) <sub>2</sub> (tpy) <sub>2</sub> (BTB) <sup>2+</sup>                     | 680 | 710 | 31 |
| Ru <sub>2</sub> (bpy) <sub>2</sub> (tpy) <sub>2</sub> (4-TBN) <sup>3+</sup>                   | 676 | 680 | 31 |
| [Ru(bpy) <sub>2</sub> ] <sub>2</sub> (bmpa-bpy) <sup>+2</sup> /PF <sub>6</sub> <sup>-</sup>   | 642 | 596 | 32 |
| [Ru(bpy) <sub>2</sub> ] <sub>2</sub> (bmdpa-bpy) <sup>+2</sup> /PF <sub>6</sub> <sup>-</sup>  | 638 | 570 | 32 |
| [Ru(bpy) <sub>2</sub> ] <sub>2</sub> (bmna-bpy) <sup>+2</sup> /PF <sub>6</sub> <sup>-</sup>   | 636 | 570 | 32 |

**m-bpy** = 4-methyl-2,2'-bipyridine

**dtb-bpy** = 4,4'-di-tert-butyl-2,2'-bipyridine

**dpen-bpy** = 4,4'-di-n-pentyl-2,2'-bipyridine

**DIM** = 4,7-dimethyl-1,10-phenanthroline

**PBI-m-H** = 2-(2-pyridyl)-1H-benzimidazole

**tpy** = 2,2',6',2''-terpyridine

**tpy-COOEt** = 2,2',6',2'', terpyridine-4'-carboxylic acid ethyl ester

**DM-bpy** = 4,4'-dimethyl-2,2'- bipyridine

**dbeb** = 4,4'-dibutyl ester-2,2'-bipyridine

**pbq** = 2,3-bis(2-pyridyl)benzoquinoline

**acac** = acetylacetonate

**trz** = 2-phenyl-4,6-dipyridin-2-yl-1,3,5-triazine

**RuTRu** = bis-2,2'-bipyridyl-ruthenium-bis-[2-((E)-4'-methyl-2,2'-bipyridinyl-4)-ethenyl]-thienyl-bis-2,2'-bipyridyl-ruthenium tetra hexafluorophosphate

**Mt-bpy** = 4-methyl-4'-(2-thienylethenyl)-2,2'-bipyridine

**aa-bpy** = Acrylic acid 4'-acryloyloxymethyl-2,2'-bipyridinyl-4-ylmethyl ester

**im-phen** = 1,2-bis(4-(1H-imidazo[4,5-f][1,10]phenanthroline-2-yl)phenoxy)ethane

**Eh-bpy** = 4,4'-bis(3-ethylheptyl)-2,2'-bipyridine

**Hmh-bpy** = 4-dihexylmethyl-4'-heptyl-2,2'-bipyridine

**H2MPy3,4DMPP** = meso-tris-3,4-dimethoxyphenyl-mono-(4-pyridyl)porphyrin

**4-TBN** = 4-(1H-tetrazol-5-yl)benzotrile

**BTB** = bis(1H-tetrazol-5-yl)benzene

**bpy** = 2,2'-bipyridine

**C<sub>2</sub> O<sub>4</sub><sup>2-</sup>** = oxalate ion

**S<sub>2</sub> O<sub>8</sub><sup>2-</sup>** = persulfate or peroxydisulfate

**TPrA** = tri-n-propylamine

**dmbp** = 4,4'-Me<sub>2</sub>bpy and **DM-bpy** = 4,4'-dimethyl-2,2'-bipyridine

**phen** = 1,10-phenanthroline

**terpy** = 2,2',2''-terpyridine

**bpz** = 2,2'-bipyrazine

**dp-bpy** = 4,4'-biphenyl-2,2'-bipyridyl

**dp-phen** = 4,7-diphenyl-1,10-phenanthroline

**dmphen** = 4,7-dimethyl-1,10-phenanthroline

**bphb** = 1,4-bis(4'-methyl-2,2'-bipyridin-4-yl)benzene

**AZA-bpy** = 4-(N-aza-18-crown-6-methyl-2,2'-bipyridine

**CE-bpy**= bipyridine ligand where a crown ether (15-crown 5) is bound to the bpy ligand in the 3- and 3'-positions

**v-bpy** =4-vinyl-4'-methyl-2,2'-bipyridine

**DC-bpy** = 4,4'-dicarboxy-2,2'-bipyridine

**PF<sub>6</sub><sup>-</sup>** =hexafluorophosphate

**bmpa-bpy** =bis(4'-methyl-2,2'-bipyridinyl-4-carbonyl)-(1,4-phenylenediamine)

**bmdpa-bpy** =bis(4'-methyl-2,2'-bipyridinyl-4-carbonyl)-(1,4-diphenylenediamine)

**bmna-bpy** =bis(4'-methyl-2,2'-bipyridinyl-4-carbonyl)-(1,4-naphthalenediamine)

S2: PL emission spectra of bpy ligand and  $[\text{Ru}(\text{bpy})_3](\text{PF}_6)_2$  in DMF solution  $10^{-5} \text{ mol lit}^{-1}$  ( $\lambda_{\text{exc}}=405 \text{ nm}$ ).

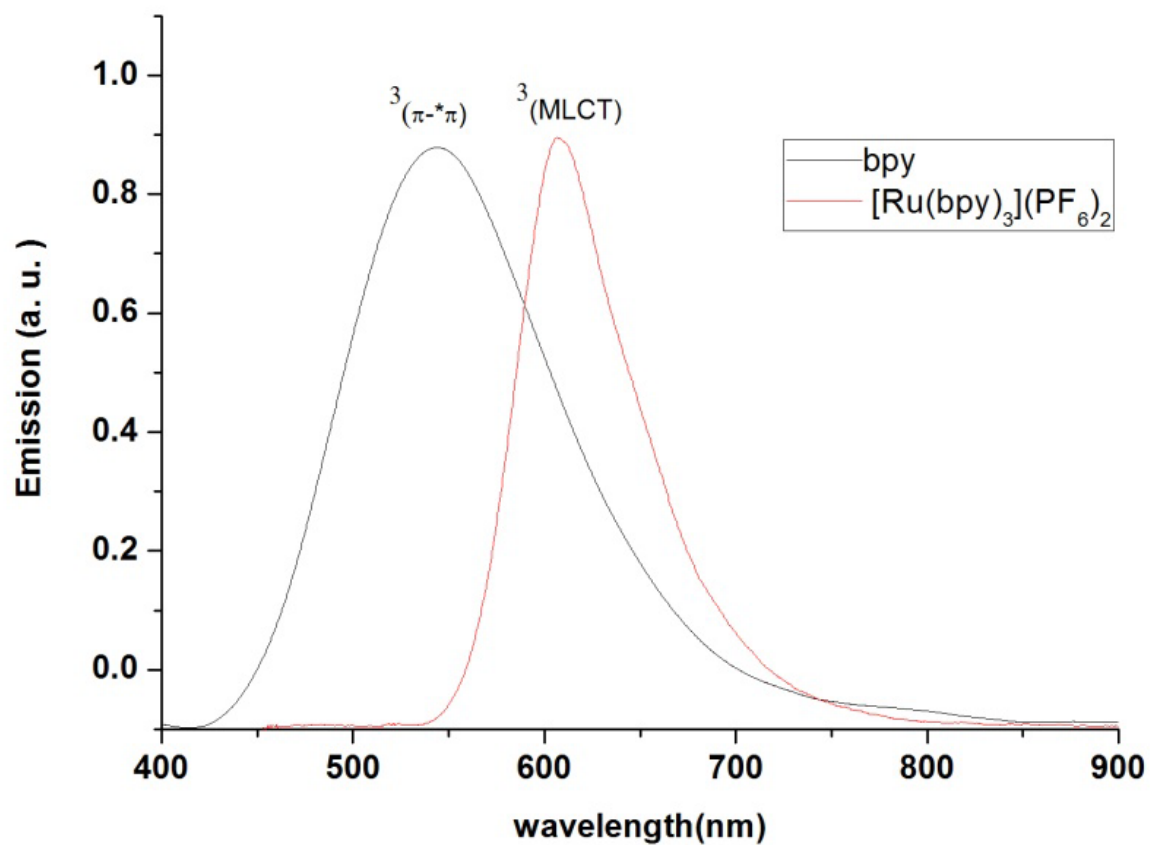



S3 : Photophysical properties of ruthenium tetrazole derivatives .

| Ruthenium tetrazole derivatives                       | PL                 |         | EL                |               | ref      |
|-------------------------------------------------------|--------------------|---------|-------------------|---------------|----------|
|                                                       | $\Phi$             | $\tau$  | $\lambda_{(max)}$ | rECL-Int. (%) |          |
| [Ru(2-TT)(tpy)(bpy)] <sup>+</sup>                     | <0.001             | 18.64   | -                 | -             | [33]     |
| [Ru{2-(Me)TT} (tpy)(bpy)] <sup>2+</sup>               | <0.001             | 22.10   | -                 | -             | [33]     |
| [Ru{2-(H)TT} (tpy)(bpy)] <sup>2+</sup>                | <0.001             | 18.44   | -                 | -             | [33]     |
| [Ru(2-TBT) (tpy)(bpy)] <sup>+</sup>                   | <0.001             | 15.79   | -                 | -             | [33]     |
| [Ru(Me)(2-TBT) (tpy)(bpy)] <sup>2+</sup>              | <0.001             | -       | -                 | -             | [33]     |
| [(tpy)(bpy)Ru(TDT)Ru(tpy)(bpy)] <sup>2+</sup>         | <0.001             | 19.34   | -                 | -             | [33]     |
| [(tpy)(bpy)Ru(Me)(TDT)(Me)Ru(tpy)(bpy)] <sup>4+</sup> | <0.001             | 22.15   | -                 | -             | [33]     |
| [Ru(4-(Me)TBN)(tpy)(bpy)] <sup>2+</sup>               | 0.008              | -       | -                 | -             | [34]     |
| [Ru(4-TBN)(tpy)(bpy)] <sup>+</sup>                    | 0.003              | -       | -                 | -             | [34]     |
| [(tpy)(bpy)Ru(BTB)Ru(tpy)(bpy)] <sup>2+</sup>         | 0.003              | -       | 710               | 45            | [34]     |
| [(tpy)(bpy)Ru(4-TBN)Ru(tpy)(bpy)] <sup>2+</sup>       | 0.008              | -       | 680               | 120           | [34]     |
| [Ru(bpy) <sub>2</sub> (pyTz)] <sup>2+</sup>           | 0.004 <sup>a</sup> | 220     | -                 | -             | [35]     |
| [Ru(bpy) <sub>2</sub> (pyrTz)] <sup>2+</sup>          | 0.003 <sup>a</sup> | 6       | -                 | -             | [35]     |
| [Ru(bpy) <sub>2</sub> {4-Me-(pyTz)}] <sup>2+</sup>    | 0.001 <sup>a</sup> | 160(10) | -                 | -             | [35]     |
| [Ru(bpy) <sub>2</sub> {4-Me(pyrTz)}] <sup>2+</sup>    | 0.003              | 150     | -                 | -             | [35]     |
| [Ru(bpy)(tpy)(TPh)] <sup>+</sup>                      | 0.003              | -       | 740               | 75            | [36]     |
| [Ru(bpy)(tpy)(4-pyTz)] <sup>+</sup>                   | 0.004              | -       | 730               | 15            | [36]     |
| [Ru(bpy)(tpy)(4-Me(TBN)] <sup>+</sup>                 | 0.006              | -       | 720               | 45            | [36]     |
| [(tpy)(bpy)Ru(BTB)Ru(bpy)(tpy)] <sup>2+</sup>         | 0.005              | -       | 700               | 45            | [36]     |
| [Ru(bpy) <sub>3</sub> ] <sup>2+</sup>                 | 0.06               | -       | 610               | 100           | [36]     |
| [Ru(TzBA)(phen) <sub>2</sub> ]                        | 0.002              | -       | 525               | 65            | Our work |
| [Ru(TzBA)(phen)SCN]                                   | 0.004              | -       | 619               | 80            | Our work |
| [Ru(TzBA)(bpy) <sub>2</sub> ]                         | 0.005              | -       | 602               | 105           | Our work |
| [Ru(TzBA)(phen)(pyTz) SCN]                            | 0.007              | -       | 621               | 135           | Our work |
| [Ru(TzBA)(bpy)(pyTz) SCN]                             | 0.009              | -       | 596               | 150           | Our work |

The relative ECL intensities (rECL-Int.) have been calculated by  $rECL-Int.(%) = 100 * I_{ECL, MAX} / I_{ECL, MAX, Ru(bpy)_3^{2+}}$ .

**tpy**:2,2':6', 2''-terpyridine

**bpy**: 2,2'-bipyridyl

**2-TTH**: 2-(1-H-tetrazole-5-yl)-thiophene

**2-TBTH**: 5-bromo-2-(1-H-tetrazole-5-yl)-thiophene

**4-TBNH**: 4-(1,H-tetrazole-5-yl)-benzonitrile

**BTBH<sub>2</sub>**: Bis-1,4-(1,H-tetrazole-5-yl)-benzene

**pyTz**: 2-(1,H-tetrazol-5-yl)pyridine)

**Pyr Tz**: pyrazinyl-tetrazolate

**bpyrTz** : 2,3-bis(1,H-tetrazol-5-yl)-pyrazine

#### References:

- [1]. N. Tokel, A. J. Bard , J. Am. Chem. Soc. 1972, 94, 2862.
- [2].R. S. Glass, L. R. Faulkner, J. Phys. Chem. 1981, 85, 1160.
- [3].W. L.Wallace, A. J. Bard, J. Phys. Chem. 1979, 83, 1350.
- [4].I. Rubinstein, A. J. Bard, J. Am. Chem. Soc. 1981, 103, 512.
- [5].F. Kanoufi, A. J. Bard, J. Phys. Chem. B 1999, 103, 10469.
- [6].H. S. White, A. J. Bard, J. Am. Chem. Soc. 1981, 104, 6891.
- [7] J. K. Leland, M. J. Powell, J. Electroanal. Chem. 1991, 318,91.
- [8]N. E. Tokel-Takvoryan, R. E. Hemingway, A. J. Bard, J. Am.Chem. Soc. 1973, 95, 6582.

- [9] J.Gonzales-Velasco, I. Rubinstein, R. J. Crutchley, A.B. P.Lever, A. Bard, J. Inorg. Chem. 1983, 22, 822
- [10] J. Gonzalez-Velasco, J. Phys. Chem. 1988, 92, 2202.
- [11] S.Yamazaki-Nishida, Y. Harima, K. Yamashita, J. Electroanal.Chem. 1990, 283, 455.
- [12] J.Ouyang, A. J. Bull. Bard, Chem. Soc. Jpn. 1988, 61, 17.
- [13] M. M. Richter, A. J. Bard, W. Kim, R. S. Schmehl, Anal. Chem.1998, 70, 310.
- [14] B. D. Muegge, M. M. Richter, Anal. Chem. 2002, 74, 547.
- [15] R. Y. Lai, M. Chiba, N. Kitamura, A. Bard, J. Anal. Chem.2002, 74, 551
- [16] H. Abruna, A. J. Bard, J. Am. Chem. Soc. 1982, 104, 2641.
- [17] D. Bruce, J. McCall, Richter, M. M. Analyst 2002,127,125.
- [18] S. Bernhard, J. Barron, P. Houston, H.Abruna, J. Ruglovksy, X. Gao, G.Malliaras, J. Am. Chem. Soc. 2002, 124, 13624.
- [19] J. Yang, K. Gordon, Chem. Phys. Lett. 2003, 372, 577.
- [20] Y. Chuai, D. N. Lee , C. Zhen, J. H. Min, B. H. Kimb, D. Zou, Synth. Met. 2004, 145,259.
- [21] H. J. Bolink, L. Cappelli, E. Coronado, P. Gavina, Inorg. Chem. 2005,44,5966.
- [22] S.M. Chang , C.H. Fan , C.C. Lai, Y.C. Chao , S.C. Hu, Surf. Coat. Technol. 2006,200,3289.
- [23] H. Xia, Y. Zhu, D. Lu, M. Li, C. Zhang, B.Yang, Y. Ma, J. Phys. Chem. B. 2006,110,18718.
- [24] S. Xun, J. Zhang, X. Li, D. Ma, Z. Y.Wang, Synth. Met. 2008,158,484
- [25] H. J. Bolink, E. Coronado, R. D. Costa, P.Gavina, E. Ortí, S. Tatay, Inorg. Chem. 2009, 48, 3907.
- [26] M. Li, J. Liu , L. Sun , J. Pan , C. Zhao, J. Organomet. Chem. 2008,693,46.
- [27] E. Puodziukynaite, J. L. Oberst, A. L. Dyer, J. R. Reynolds, J. Am. Chem. Soc. 2012, 134, 968.
- [28] C. Ju, C.H. Chen, C.L. Yuan, K.Z. Wang, Thin Solid Films. 2011, 519, 3883.
- [29] I. Oner, C. Sahin , C. Varlikli, Dyes Pig. 2012, 95 ,23.
- [30] R. Pyati , M. Richter, Annu. Rep.Prog.Chem.,Sect.C, 2007, 103,12.
- [31] S. Stagni, A. Palazzi, S. Zacchini, B. Ballarin, C. Bruno, M. Marcaccio, F. Paolucci, M. Monari, M. Carano, A.J. Bard, Inorg. Chem. 2006, 45, 695.
- [32] M. Li, J. Liu , C. Zhao , L. Sun, J. Organomet. Chem. 2006, 691,4189.
- [33] S.Stagni, A. Palazzi, P. Brulatti, M. Salmi, S. Muzzioli, S. Zacchini, M. Marcaccio, and F. Paolucci, Eur. J. Inorg. Chem. 2010, 4643.

- [34] S. Stagni, A. Palazzi, S. Zacchini, B. Ballarin, C. Bruno, M. Marcaccio, F. Paolucci, M. Monari, M. Carano, . A. J. Bard, *Inorg. Chem.* 2006, 45, 695.
- [35] S. Stagni, E. Orselli, A. Palazzi, L. De Cola, S. Zacchini, C. Femoni, M. Marcaccio, F. Paolucci, . S. Zanarini, *Inorg. Chem.* 2007, 46, 9126.
- [36] S. Zanarini, A. J. Bard, M. Marcaccio, A. Palazzi, F. Paolucci, . S. Stagni, *J. Phys. Chem. B*, 2006, 110, 22551.
